# Supplementary material
Source: Springer Nature journal article supplement (https://www.springermedizin.de/resource/supplementary/12936_2010_1663_MOESM2_ESM.pdf/9542306)
Supplement: MOESM2 [file 9542306]

Phase I

**Preparation**

Time

*National level*

**1. Coordination**

National Malaria Control Program

**2. Planning**

Contractors

*Regional level*

**3. Courtesy Calls and Sensitization**

RC, RAS, RMO, RHMT, ITN Cell, contractors

*District Level*

**4. Courtesy Calls and Sensitization**

DC, DED, DMO, CHMT, ITN Cell, contractors

Phase II

**Training and Registration**

*Division level*

**5. Training**

Contractors, WEO, VEO

**6. Supervision**

ITN Cell, NMCP, DMO, DMFP

Registration

*Village level*

**7. Volunteer Selection, training, registration, and report writing**

WEO, VEO, volunteer

**8. Spot checks, supervision & social mobilization**

Contractors

*District and National level*

**9. Final report compilation**

Phase III

**Issuing**

*National level*

**10. Place LLIN order**

NMCP, ITN Cell

*Village level*

**11. LLIN delivery, issuing and reporting**

WEO, VEO, volunteers

**12. Supervision and social mobilization**

Contractors

*District and National level*

**13. Final report compilation**

DMFP, DMO, DED, contractors, ITN Cell
